# Supplementary material for: Understanding the Role of PIN Auxin Carrier Genes under Biotic and Abiotic Stresses in Olea europaea L
Source: Biology (Basel). 2022 Jul 11;11(7):1040. doi: 10.3390/biology11071040 (PMC9312197; doi:10.3390/biology11071040)
Supplement: Supplementary file 1 [file biology-11-01040-s001.zip]

Archive with 12 entries (12 files):
- Supplementary FigS1.jpg
- Supplementary FigS2.jpg
- Supplementary FigS3.jpg
- Supplementary FigS4.jpg
- Supplementary FigS5.jpg
- Supplementary FigS6.jpg
- Supplementary FigS7.jpg
- Supplementary Table S1.pdf
- Supplementary Table S2.pdf
- Supplementary Table S3.pdf
- Supplementary Table S4.pdf
- Supplementary Table S5.pdf
