# Supplementary material for: Understanding the Role of PIN Auxin Carrier Genes under Biotic and Abiotic Stresses in Olea europaea L
Source: Biology (Basel). 2022 Jul 11;11(7):1040. doi: 10.3390/biology11071040 (PMC9312197; doi:10.3390/biology11071040)
Supplement: Supplementary file 1 [file biology-11-01040-s001.zip › Supplementary Table S2.pdf]

**Supplementary Table S2.** Description of samples used and respective accession numbers

([https://www.ebi.ac.uk/ena/data/view/PRJNA256033&portal=read\\_experiment](https://www.ebi.ac.uk/ena/data/view/PRJNA256033&portal=read_experiment)).

| <b>Sample</b>                       | <b>Biosample accession number</b> | <b>SRA accession number</b> |
|-------------------------------------|-----------------------------------|-----------------------------|
| Unwounded plant roots               | SAMN02937426                      | SRR1525051<br>SRR1525052    |
| Wounded roots_2dpw                  | SAMN02937429                      | SRR1524949<br>SRR1524950    |
| Wounded roots_7dpw                  | SAMN02937430                      | SRR1524951<br>SRR1524952    |
| Uninfected plant roots              | SAMN02937426                      | SRR1525051<br>SRR1525052    |
| Infected roots with V. dahliae_2dpi | SAMN02937431                      | SRR1525086<br>SRR1525087    |
| Infected roots with V. dahliae_7dpi | SAMN02937432                      | SRR1525113<br>SRR1525114    |
| Unstressed plant leaves             | SAMN02937434                      | SRR1525224<br>SRR1525226    |
| Cold-stressed leaves_1dac           | SAMN02937435                      | SRR1525284<br>SRR1525285    |
| Cold-stressed leaves_10dac          | SAMN02937436                      | SRR1525286<br>SRR1525287    |

dpw: days post wounding, dpi: days post inoculation, dac: days after cold exposure
