# Supplementary material for: Understanding the Role of PIN Auxin Carrier Genes under Biotic and Abiotic Stresses in Olea europaea L
Source: Biology (Basel). 2022 Jul 11;11(7):1040. doi: 10.3390/biology11071040 (PMC9312197; doi:10.3390/biology11071040)
Supplement: Supplementary file 1 [file biology-11-01040-s001.zip › Supplementary Table S3.pdf]

| Gene                                                 | ID             | ORF<br>(bp) | Gene<br>(bp) | No.<br>exons | Exons lenght (bp) |     |     |     |     |    |     | Introns lenght (bp) |             |     |             |     |     |
|------------------------------------------------------|----------------|-------------|--------------|--------------|-------------------|-----|-----|-----|-----|----|-----|---------------------|-------------|-----|-------------|-----|-----|
|                                                      |                |             |              |              | 1                 | 2   | 3   | 4   | 5   | 6  | 7   | 1                   | 2           | 3   | 4           | 5   | 6   |
| <i>Olea europaea subsp. europaea var. euroapea</i>   |                |             |              |              |                   |     |     |     |     |    |     |                     |             |     |             |     |     |
| <i>OePIN1a</i>                                       | OE6A110180P1   | 1794        | 3287         | 6            | 1168              | -   | 241 | 86  | 158 | 77 | 67  | 79                  | -           | 130 | <b>1115</b> | 89  | 77  |
| <i>OePIN1b</i>                                       | OE6A100299P2   | 1794        | 3818         | 6            | 1168              | -   | 241 | 86  | 158 | 77 | 67  | 88                  | -           | 81  | <b>1104</b> | 654 | 94  |
| <i>OePIN1c</i>                                       | OE6A008174P1   | 1776        | 3192         | 6            | 1144              | -   | 247 | 86  | 158 | 77 | 67  | 87                  | -           | 92  | 309         | 826 | 99  |
| <i>OePIN1d</i>                                       | OE6A056306P2   | 1788        | 2853         | 6            | 1132              | -   | 271 | 86  | 158 | 77 | 67  | 453                 | -           | 84  | 198         | 108 | 219 |
| <i>OePIN1e</i>                                       | OE6A046725P1   | 1788        | 2746         | 6            | 1132              | -   | 271 | 86  | 158 | 77 | 67  | 445                 | -           | 87  | 193         | 102 | 128 |
| <i>OePIN1e</i>                                       | OE6A036288P1   | 1788        | 2740         | 6            | 1132              | -   | 271 | 86  | 158 | 77 | 67  | 443                 | -           | 83  | 193         | 102 | 128 |
| <i>OePIN2a</i>                                       | OE6A080671P3   | 1872        | 3332         | 6            | 1231              | -   | 256 | 86  | 158 | 77 | 67  | 197                 | -           | 487 | 319         | 291 | 163 |
| <i>OePIN2b</i>                                       | OE6A029229P1   | 1869        | 9225         | 6            | 1228              | -   | 256 | 86  | 158 | 77 | 67  | 130                 | -           | 577 | <b>6370</b> | 165 | 111 |
| <i>OePIN3a</i>                                       | OE6A013411P1   | 1896        | 2873         | 6            | 1231              | -   | 280 | 86  | 158 | 77 | 67  | 90                  | -           | 98  | 510         | 187 | 89  |
| <i>OePIN3b</i>                                       | OE6A121027P4   | 1929        | 2927         | 6            | 1255              | -   | 289 | 86  | 158 | 77 | 67  | 131                 | -           | 89  | 456         | 218 | 101 |
| <i>OePIN3c</i>                                       | OE6A040519P1   | 1929        | 2897         | 6            | 1255              | -   | 289 | 86  | 158 | 77 | 67  | 139                 | -           | 91  | 410         | 227 | 98  |
| <i>OePIN3c</i>                                       | OE6A094847P1   | 1929        | 2881         | 6            | 1255              | -   | 289 | 86  | 158 | 77 | 67  | 140                 | -           | 91  | 403         | 228 | 87  |
| <i>OePIN5a</i>                                       | OE6A089248P2   | 1149        | 1689         | 5            | 758               | -   | -   | 86  | 158 | 77 | 73  | 96                  | -           | -   | 226         | 112 | 103 |
| <i>OePIN5b</i>                                       | OE6A062743P1   | 1095        | 1567         | 5            | 704               | -   | -   | 86  | 158 | 77 | 73  | 79                  | -           | -   | 176         | 110 | 104 |
| <i>OePIN5c</i>                                       | OE6A015595P2   | 1062        | 1681         | 5            | 671               | -   | -   | 86  | 158 | 77 | 73  | 121                 | -           | -   | 102         | 312 | 81  |
| <i>OePIN5d</i>                                       | OE6A086522P1   | 1104        | 1736         | 5            | 713               | -   | -   | 86  | 158 | 77 | 73  | 140                 | -           | -   | 112         | 286 | 91  |
| <i>OePIN5e</i>                                       | OE6A029376P1   | 1089        | 1713         | 5            | 698               | -   | -   | 86  | 158 | 77 | 73  | 140                 | -           | -   | 103         | 286 | 92  |
| <i>OePIN6</i>                                        | OE6A074435P2   | 1584        | 5086         | 7            | 425               | 572 | 202 | 86  | 158 | 77 | 67  | 695                 | <b>2492</b> | 74  | 78          | 72  | 88  |
| <i>OePIN8</i>                                        | OE6A113148P1   | 1071        | 2376         | 5            | 508               | 178 | -   | -   | 244 | 77 | 67  | 1080                | 66          | -   | -           | 69  | 87  |
| <i>Olea europaea subsp. europaea var. sylvestris</i> |                |             |              |              |                   |     |     |     |     |    |     |                     |             |     |             |     |     |
| <i>OePIN1a</i>                                       | XM_023034033.1 | 1794        | 3288         | 6            | 1168              | -   | 241 | 86  | 158 | 77 | 67  | 79                  | -           | 131 | 1115        | 89  | 77  |
| <sup>1</sup> <i>OePIN1b</i>                          | XM_023030314.1 | 1530        | 1697         | 3            | 1168              | -   | 241 | 124 | -   | -  | -   | 83                  | -           | 81  | -           | -   | -   |
| <i>OePIN1c</i>                                       | XM_022985718.1 | 1776        | 3187         | 6            | 1144              | -   | 247 | 86  | 158 | 77 | 67  | 87                  | -           | 92  | 297         | 833 | 99  |
| <i>OePIN1d</i>                                       | XM_023032854.1 | 1800        | 3639         | 6            | 1156              | -   | 259 | 86  | 158 | 77 | 67  | 462                 | -           | 84  | 198         | 108 | 984 |
| <i>OePIN1e</i>                                       | XM_022996599.1 | 1788        | 2741         | 6            | 1132              | -   | 271 | 86  | 158 | 77 | 67  | 445                 | -           | 83  | 192         | 102 | 128 |
| <sup>2</sup> <i>OePIN2a</i>                          | XM_022997346.1 | 1338        | 1457         | 2            | 1228              | -   | 113 | -   | -   | -  | -   | 116                 | -           | -   | -           | -   | -   |
| <sup>3</sup> <i>OePIN2b</i>                          | XM_023007658.1 | 1101        | 2646         | 7            | 417               | 123 | 110 | 144 | 166 | 77 | 67  | 289                 | 92          | 292 | 435         | 296 | 138 |
| <i>OePIN3a</i>                                       | XM_023021220.1 | 1896        | 2878         | 6            | 1231              | -   | 280 | 86  | 158 | 77 | 67  | 90                  | -           | 98  | 515         | 187 | 89  |
| <i>OePIN3b</i>                                       | XM_023022745.1 | 1929        | 2924         | 6            | 1255              | -   | 289 | 86  | 158 | 77 | 67  | 131                 | -           | 89  | 456         | 218 | 98  |
| <i>OePIN3c</i>                                       | XM_023026252.1 | 1929        | 3327         | 6            | 1255              | -   | 289 | 86  | 158 | 77 | 67  | 140                 | -           | 91  | 849         | 228 | 87  |
| <i>OePIN5a</i>                                       | XM_022996510.1 | 1083        | 1623         | 5            | 692               | -   | -   | 86  | 158 | 77 | 73  | 140                 | -           | -   | 103         | 286 | 92  |
| <i>OePIN5a</i>                                       | XM_022996594.1 | 1083        | 1623         | 5            | 692               | -   | -   | 86  | 158 | 77 | 73  | 96                  | -           | -   | 226         | 112 | 103 |
| <i>OePIN5b</i>                                       | XM_023036296.1 | 1095        | 1572         | 5            | 704               | -   | -   | 86  | 158 | 77 | 73  | 79                  | -           | -   | 176         | 110 | 109 |
| <i>OePIN5c</i>                                       | XM_022989965.1 | 1062        | 1681         | 5            | 671               | -   | -   | 86  | 158 | 77 | 73  | 121                 | -           | -   | 102         | 312 | 81  |
| <i>OePIN5c</i>                                       | XM_022989968.1 | 1062        | 1681         | 5            | 671               | -   | -   | 86  | 158 | 77 | 73  | 121                 | -           | -   | 102         | 312 | 81  |
| <i>OePIN5d</i>                                       | XM_023005297.1 | 825         | 1449         | 5            | 434               | -   | -   | 86  | 158 | 77 | 73  | 140                 | -           | -   | 103         | 286 | 92  |
| <i>OePIN6</i>                                        | XM_023039423.1 | 1539        | 5323         | 6            | 425               | 572 | 202 | 86  | 142 | -  | 115 | 695                 | 2492        | 74  | 78          | -   | 442 |
| <i>OePIN8</i>                                        | XM_023028238.1 | 1071        | 2377         | 5            | 508               | 178 | -   | -   | 244 | 77 | 67  | 1081                | 66          | -   | -           | 69  | 87  |

**Supplementary Table S3.** Information regarding size and exon/intron composition (number and sequence length) of *OePIN* genes in *Olea europaea* subsp. *europaea* var. *europaea* and var. *sylvestris*.

<sup>1</sup>Sequence interrupted due to an APA located at intron 3 which leads to a truncated protein sequence.

<sup>2</sup>*OePIN2a* – scaffold NC\_036238.1 with 4541 Ns within the sequence that leads to the absence of the “Mem\_tans” domain at the protein C-termini. Functionality of protein encoded by this gene sequence must to be confirmed.
