# Supplementary material for: Understanding the Role of PIN Auxin Carrier Genes under Biotic and Abiotic Stresses in Olea europaea L
Source: Biology (Basel). 2022 Jul 11;11(7):1040. doi: 10.3390/biology11071040 (PMC9312197; doi:10.3390/biology11071040)
Supplement: Supplementary file 1 [file biology-11-01040-s001.zip › Supplementary Table S4.pdf]

**Supplementary Table S4.** Information regarding PIN members of *Olea europaea* subsp. *europaea* var. *europaea* (sequences retrieved from the whole genome databases available for cv. 'Farga' at <http://denovo.cnag.cat/genomes/olive/>).

| Gene           | Locus ID     | Protein     |          |      |                         | Number of transmembrane helices | Hydrophilic loop size (bp) | SP length (location: affirmative rate) |
|----------------|--------------|-------------|----------|------|-------------------------|---------------------------------|----------------------------|----------------------------------------|
|                |              | Length (aa) | MW (kDa) | PI   | Hydrophobic amino acids |                                 |                            |                                        |
| <i>OePIN1a</i> | OE6A110180P1 | 598         | 65.573   | 8.82 | 223                     | 9 (5/4)                         | 330                        | 26 (PM: 0.640)                         |
| <i>OePIN1b</i> | OE6A100299P2 | 598         | 65.797   | 9.15 | 225                     | 9 (5/4)                         | 330                        | 26 (PM: 0.640)                         |
| <i>OePIN1c</i> | OE6A008174P1 | 592         | 65.290   | 8.70 | 225                     | 9 (5/4)                         | 330                        | 26 (PM: 0.640)                         |
| <i>OePIN1d</i> | OE6A056306P2 | 596         | 65.088   | 8.98 | 225                     | 8 (4/4)                         | 330                        | 26 (PM: 0.640)                         |
| <i>OePIN1e</i> | OE6A046725P1 | 596         | 64.710   | 9.15 | 223                     | 8 (4/4)                         | 330                        | 26 (PM: 0.640)                         |
| <i>OePIN1e</i> | OE6A036288P1 | 596         | 64.742   | 9.15 | 223                     | 8 (4/4)                         | 330                        | 26 (PM: 0.640)                         |
| <i>OePIN2a</i> | OE6A080671P3 | 624         | 68.045   | 9.05 | 246                     | 10 (5/5)                        | 323                        | 26 (PM: 0.640)                         |
| <i>OePIN2b</i> | OE6A029229P1 | 623         | 67.954   | 8.03 | 247                     | 10 (5/5)                        | 323                        | 26 (ER: 0.685)                         |
| <i>OePIN3a</i> | OE6A013411P1 | 632         | 69.004   | 7.56 | 243                     | 9 (5/4)                         | 362                        | 26 (PM: 0.640)                         |
| <i>OePIN3b</i> | OE6A121027P4 | 643         | 70.271   | 8.00 | 250                     | 9 (5/4)                         | 362                        | 26 (PM: 0.640)                         |
| <i>OePIN3c</i> | OE6A040519P1 | 643         | 70.348   | 8.06 | 249                     | 9 (5/4)                         | 362                        | 26 (PM: 0.640)                         |
| <i>OePIN3c</i> | OE6A094847P1 | 643         | 70.319   | 8.12 | 249                     | 9 (5/4)                         | 362                        | 26 (PM: 0.640)                         |
| <i>OePIN5a</i> | OE6A089248P2 | 361         | 40.224   | 6.90 | 167                     | 8 (4/4)                         | 85                         | 46 (PM: 0.600)                         |
| <i>OePIN5b</i> | OE6A062743P1 | 365         | 40.824   | 6.91 | 170                     | 8 (4/4)                         | 66                         | 24 (ER: 0.685)                         |
| <i>OePIN5c</i> | OE6A015595P2 | 354         | 38.796   | 8.30 | 161                     | 8 (4/4)                         | 46                         | 26 (ER: 0.685)                         |
| <i>OePIN5d</i> | OE6A086522P1 | 368         | 40.323   | 6.03 | 170                     | 9 (5/4)                         | 61                         | 24 (ER: 0.685)                         |
| <i>OePIN5e</i> | OE6A029376P1 | 363         | 39.788   | 6.49 | 167                     | 8 (4/4)                         | 55                         | 24 (ER: 0.685)                         |
| <i>OePIN6</i>  | OE6A074435P2 | 528         | 58.644   | 8.09 | 216                     | 9 (5/4)                         | 303                        | 26 (ER: 0.685)                         |
| <i>OePIN8</i>  | OE6A113148P1 | 357         | 38.910   | 9.61 | 178                     | 8 (4/4)                         | 52                         | 61 (ER: 0.685)                         |

Protein length, molecular weight and isoelectric point were determined by using the EditSeq from Lasergene 7 software (DNASTAR, Madison, WI, USA). Transmembrane helices and topology of OePIN proteins was predicted at the THMM automatic server, freely available at <https://services.healthtech.dtu.dk/service.php?TMHMM-2.0>. Signal peptide (SP) was predicted by PSORT (<http://psort1.hgc.jp/form.html>).
