# Supplementary material for: Understanding the Role of PIN Auxin Carrier Genes under Biotic and Abiotic Stresses in Olea europaea L
Source: Biology (Basel). 2022 Jul 11;11(7):1040. doi: 10.3390/biology11071040 (PMC9312197; doi:10.3390/biology11071040)
Supplement: Supplementary file 1 [file biology-11-01040-s001.zip › Supplementary Table S5.pdf]

**Supplementary Table S5.** Pairwise differential expression results achieved in the different analysis (all comparisons were made considering the control sample, in case of Cold treatment and wounding the samples collected at T0, and in case of infection with *V. dahliae* the samples collected at the same timepoints from wounded plants).

|                                | <b>Wounding</b> |       | <b><i>V. dahliae</i></b> |       | <b>Cold</b> |       |
|--------------------------------|-----------------|-------|--------------------------|-------|-------------|-------|
| Timepoint (days)               | 2               | 7     | 2                        | 7     | 1           | 10    |
| N. of features after filtering | 45532           | 45534 | 43051                    | 43171 | 40213       | 44126 |
| up-regulated                   | 5698            | 2857  | 6754                     | 6116  | 2240        | 4188  |
| down-regulated                 | 8207            | 3933  | 5482                     | 7953  | 2716        | 4394  |
